# Supplementary material
Source: publisher figshare collection journal article supplement (https://brill.figshare.com/articles/dataset/_/5166493)
Supplement: Supplementary file 2 [file 1]

# The 6<sup>th</sup> China International Forum on Cognitive Linguistics

*Language, Culture and Mind:*

10 lectures on development, evolution and cognitive linguistics

Chris Sinha, University of Portsmouth, UK  
chris.sinha@port.ac.uk

---

## Lecture 9

Language as a biocultural niche and social  
institution



# What I want to convince you of

---

- The biology of language needs to be understood in both evolutionary and ecological terms
- Language is a biocultural niche and ecological artefact
- Grammar is not innate
- Language is a social, semiotic and normative institution, and can be formally so defined and analyzed

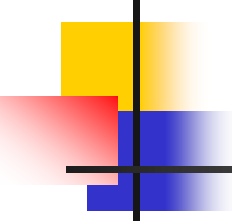

# The traditional paradigm in the human sciences

---

- Culture is opposed to Nature
- Culture (like language) is uniquely human
- Language can therefore be either part of (unique) human nature (nativism), or part of (unique) human culture (environmentalism)
- Or there is an interaction between the two (genes and environment) so that it is part of both
- Language learning is viewed as the “exposure” of an organism to an “input” which the learner must internalize



# Problems

---

- The human genome is not sufficiently unique for nativism to be plausible
  - 95-98% overlap with chimpanzee genome
  - No difference of orders of magnitude in genetic material available for coding (hgp)
  - Therefore the human language capacity is probably not genetically encoded
- Culture is not uniquely human
  - Suggesting that culture is part of nature
  - So we need a biological account of culture
  - And perhaps a cultural account of human biology



# Biology and culture

---

- Doesn't this mean sociobiology?
- No, though (for example) E.O. Wilson has indeed made a similar point (the theory of consilience)
- However, reductionism is not the only alternative: the theory of *epigenesis* proposes that, developmentally, the constructivist relationship between biology and culture is a two-way street
- An *ecological* approach to the language environment views language, not as an "input" to an information processor, but as a support and constraint on effective organismic action
- *The first part of this presentation proposes a theoretical synthesis of epigenetic and ecological approaches, in an extended Darwinian framework*

# Part One

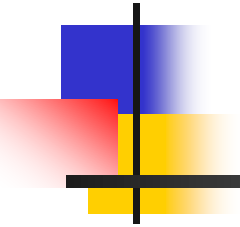

Biology of language: ecology and  
epigenesis



# Neo-Darwinism: the standard story

---

- Q: What is the unit of selection?
- A: The gene, or (sub-)populations of interacting genes.
- Q: What does the selecting?
- A: The environment (natural selection) or other genes (sexual selection and kin selection)
- Q: What is selected?
- A: Fitness
- Q: What's that?
- A: Differential reproductive success



# The problem with neo-Darwinism

What is actually selected (“site of selection”)?

---

- Genes do not come singly but as combinations (genotypes) “packaged” in organisms (phenotypes)
- So at the very least it is organisms, not genes, which are subject to direct selection pressure
- Technically: the *replicator* is the organism, not the gene.
- The level of *organism* is essential for understanding epigenesis
- Organisms are morphological individuals (though not “essentially” and perhaps not necessarily), but morphology is not the site of selection
- It is the functioning, behaving organism which is the replicator and site of selection (Piaget: The leading role of behaviour in evolution)





# Darwinism beyond neo-

## Darwinism Integrating ecology into evolution

---

- Neo-Darwinism is based upon population genetics plus a shaky “central dogma”
- It neglects the causal role in the shaping of the environment by the organism
- Examples:
  - The path, the prey and the predator
  - The hoof and the steppe
  - Beavers and bower birds: animal artefacts
  - The termite mound and the “group organism”



# Constructing your own affordances

---

- In Gibson's ecological psychology, affordances constitute the environment for effective action and perception (behaviour)
- But Gibson neglects the fact that affordances may be constructed by the animal (nests are for nesting, burrows are for burrowing)
- In such cases, the site of selection can be considered to be the organism in its *self-constructed* niche (organism-niche coupling)



# Laland et al.'s model

---

- A phenogenotype is a species-specific organism-niche combination, functionally equivalent to an organism (cf Dawkins' "extended phenotype").
- (my definition): a class of interacting genes in a bound but not genetically determined relationship with some aspect of a self-constructed environment
- So the *site of selection* is now *organism plus artefact*



# Human culture and language

---

- From an ecological-evolutionary point of view, culture is phenotypic
- Human culture is symbolic and linguistic
- Language is an artefact/niche, and the capacity to use and acquire it involves the evolution and replication of a phenotypical “biocultural complex”
- Succinctly: the human language capacity is phenotypic, not “inscribed in the genes”
- How, then, do individuals acquire language?



# Epigenetic development

---

- Elaboration
- Construction
- Unidirectionality (time's arrow)
- Irreversibility
- Examples:
  - Birdsong
  - Human natural language



# Epigenesis defined

---

- In epigenesis the developmental trajectory and final form of the developing behaviour are a consequence both the environmental information, and of the genetically encoded information.
- A genetically specified initial behavioural repertoire is *elaborated* through experience of a relevant environment, yielding an envelope of potential trajectories and outcomes.
- The process of elaboration is *directional*, and once it has taken place the initial plasticity of the embryonic, or unelaborated, repertoire is largely (though not necessarily wholly) lost.
- Epigenesis involves a developmental transition from relative organismic plasticity and informational openness, to relative rigidity and informational closure.



# Epigenesis and the symbolic species

---

What makes humans unique is not an innate language acquisition device plus a variety of other species-specific innate cognitive modules, but a generalized semiotic or symbolic capacity epigenetically developed from a suite of cognitive capacities largely shared with other species, but attaining higher levels of organization in humans.



# Learning and using a language

---

- The grammar of the language is *in the language*, just as the structure of the nest is in the nest. The capacity for language is thus a cognitive-behavioural relationship between language user and the constituents of language, just as the capacity for building a nest is a cognitive-behavioural relationship between the builder and the constituents of the nest; and it is this *relationship* that, in each case, has been selected for in evolution.
- There is no need for the organism to possess an internal model of the grammar of a language to account for language acquisition, any more than the building of a nest requires an internal model of the nest.



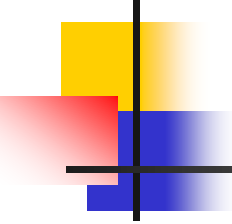

# Epigenesis, ecology and evolution

---

- Augmented epigenesis is advantageous for organisms in which phenogenotypic couplings are both frequent and variable, which is an appropriate general description of the human cultural organism.
- Regulatory genes augmenting epigenetic openness can therefore be expected to have been phenogenotypically selected for in the human genome
- This in turn permits further adaptive selection for domain-specific learning in the semiotic biocultural complex, in particular for language.



# The contextuality of language

---

- The class of organisms with the language capacity (normally developing humans) is thus a phenogenotypic replicator systemically associated with a wider biocultural complex of symbolic and constructive cognitive capacities, also of a phenogenotypic nature
- Individual language acquisition and use is situated in the contexts of actuation of these inter-related capacities, and is therefore profoundly socially and semiotically contextual



# Language and other artefacts

---

- The language artefact/niche is culturally and materially situated, that is, dynamically embedded within a semiotic network which includes other symbolic and non-symbolic artefacts.

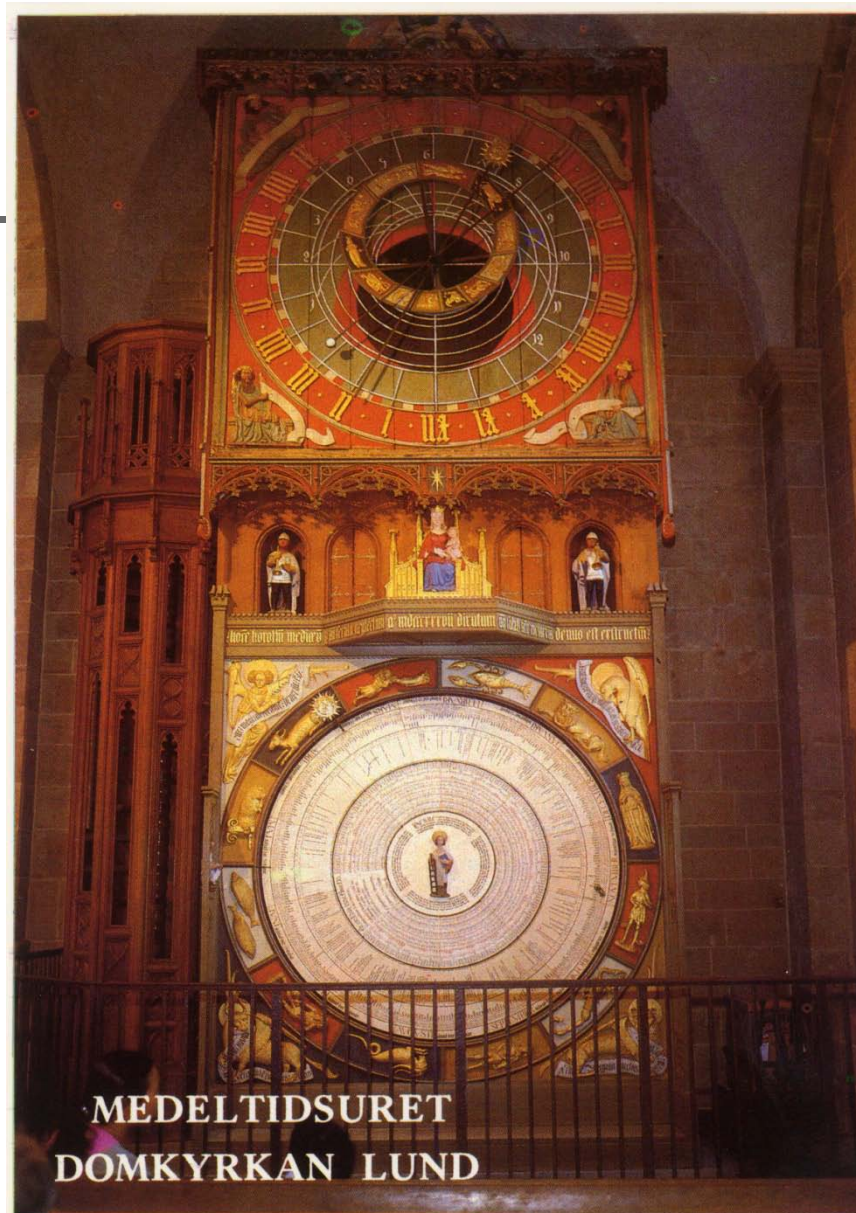

MEDELTIDSURET  
DOMKYRKAN LUND



# Extended embodiment (What it means to be human)

---

- The human organism, by virtue of the semiotic status of the body and the normative shaping of its activities in a cultural field, has a "dual ontology"
- It is both culturally constituted as a constituent of the semiosphere and, at a purely biological level, a genetic individual.
- The body is part of the system which extends beyond the body, as well as being the originating *sine qua non* of that system.
- While non-human organisms are simplex, the human organism is duplex, and its coupling with constructed niches involves a developmental process of auto-construction.



# Two Views of Evolution and Development

## The Traditional View

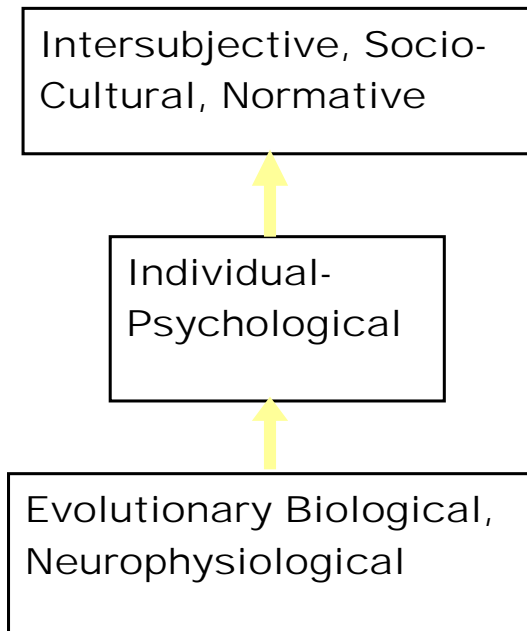

## The Alternative View

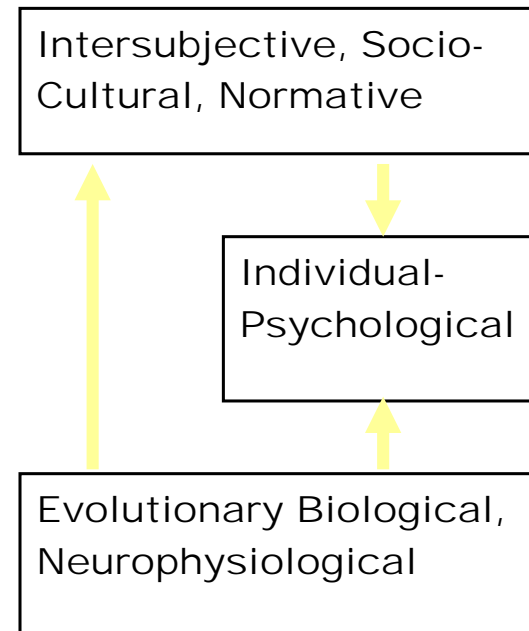



## Part Two

---

Language as social fact and social  
institution



# Social Facts: Durkheim

---

- “a category of facts which present very special characteristics: they consist of manners of acting, thinking, and feeling external to the individual, which are invested with a coercive power by virtue of which they exercise control over him.” (Durkheim, 1982 [1895]).
- The *objectivity* of social facts thus consists in the fact they are independent of any single individual's thoughts or will.





# Ontology and methodology of social facts

---

- social facts are irreducible to psychological facts, structures or processes, though they depend upon these and influence them
- Social facts are *objects* of shared, mutual, intersubjective knowledge
- Language is a social fact (institution)



## The semiotic ontology of the social: a brief formal account

---

John Searle on social (institutional) facts:

X counts as Y in C (ontext)

Example: a twenty dollar bill *counts as* a monetary token with this particular exchange value.

NB: the note does not *stand for* or *represent* twenty dollars, it *is* twenty dollars. It is self-identical; its value is subtended by (though non-reducible to) its material existence. Destroy the note, you destroy the value.



# Representation and standing for

---

- *The conditions on representation*

"To represent something ... is to cause something else to stand for it, in such a way that both the relationship of 'standing for', and that which is intended to be represented, can be recognized."

(Sinha 1988: 37)



# Signs and signification

---

[X counts as S & S stands for M] in C

X= anything

S = sign

M = meaning (signified)

This simple notation clarifies the “double articulation” of the sign, the conventional unity of substance and signification.

Note:

*C* may now include *C<sub>ss</sub>*, the sign system, and *C<sub>c</sub>*, the community of users



# The subsystems of language

---

## 1. Grammar (in the wide sense):

X counts as S in C<sub>ss</sub> for C<sub>c</sub> *or*

X counts as S in L

L = This language

## 2. Semantics

Presupposing 1:

S stands for M in L

## 3. Pragmatics

Presupposing 1 & 2:

X counts as A<sub>s</sub> in C

A<sub>s</sub> = This speech act (including reference)



# Some consequences

---

- The semantic theory of meaning is underdetermined by this formulation, and need not be truth-functional, but *is* conventional and normative (as are all the subsystems)
- Semantics is distinguished from pragmatics without necessitating a truth functional semantics
- Contextual dependence characterises all subsystems, but does not erase the distinctions between them
- Language as a social object has its own proper structure subtended by but irreducible to intentionality



# Summary

---

- What is special about human culture is not its mere existence, but its symbolic nature
- Language is an artefact/niche, not an “input” to be “internalized” as structure
- Language is situated by other semiotic artefacts
- The human language capacity is not innate, but epigenetically developed and phenogenotypic
- There is no mental grammar. Grammar is a social institution, normatively regulating conduct, and we learn what is necessary to *act in it*.



# Future directions

---

- The cognitive sciences must move beyond the classical (individualist-mentalist) cognitivist paradigm, and take seriously the normativity constituting social life
- Language and language learning are matters of participation and interaction in an intersubjective field constituted by symbolic, as well as non-symbolic, but signifying, artefacts
- Embodiment extends beyond the body, meaning is grounded not just in brains, but also in the world





# References

---

- Laland KN, Odling-Smee J, Feldman MW (2000) Niche construction, biological evolution, and cultural change. *Behavioral and Brain Sciences* 23: 131—175
- Searle, J. (1995) *The Construction of Social Reality*. Cambridge: CUP.
- Sinha C. (1988) *Language and Representation: A Socio-Naturalistic Approach to Human Development*. Hemel Hempstead: Harvester-Wheatsheaf.
- Sinha C (2004) The evolution of language: From signals to symbols to system. In: *Evolution of Communication Systems: A Comparative Approach* (Oller DK, Griebel U, eds), 217—235. Cambridge, MA: MIT Press.
- Sinha, C. (2006) Epigenetics, Semiotics, and the Mysteries of the Organism. *Biological Theory* 1: 1-4.
- Sinha, C. (in press) Language as a biocultural niche and social institution. In Vyvyan Evans and St  phanie Pourcel (Eds.) *New Directions in Cognitive Linguistics*. Amsterdam: John Benjamins.
